# Supplementary material
Source: PubMed Central journal article supplement (PMC4978127)

## Supplementary Online Content

Hwang TS, Gao SS, Liu L, et al. Automated quantification of capillary nonperfusion using optical coherence tomography angiographic in diabetic retinopathy. *JAMA Ophthalmol*. Published online January 21, 2016.  
doi:10.1001/jamaophthalmol.2015.5658.

**eTable 1.** Patient Characteristics

**eTable 2.** Additional Statistics on Vessel Densities and Avascular Areas in Diabetics vs Nondiabetics

**eFigure.** Nonperfusion Detection in Healthy Controls

This supplementary material has been provided by the authors to give readers additional information about their work.

**eTable 1.** Patient Characteristics

| <b>Subject</b> | <b>Sex</b> | <b>Age</b> | <b>Study Eye</b> | <b>Retinopathy Severity</b> | <b>DME<sup>a</sup></b> | <b>VA<sup>b</sup></b> |
|----------------|------------|------------|------------------|-----------------------------|------------------------|-----------------------|
| <b>1</b>       | M          | 63         | OD               | Mild NPDR <sup>c</sup>      | Yes                    | 20/150                |
| <b>2</b>       | M          | 67         | OS               | Mild NPDR                   | Yes                    | 20/50                 |
| <b>3</b>       | M          | 65         | OD               | Moderate NPDR               | Yes                    | 20/25                 |
| <b>4</b>       | M          | 47         | OS               | PDR <sup>d</sup>            | Yes                    | 20/40                 |
| <b>5</b>       | M          | 28         | OS               | PDR                         | No                     | 20/30                 |
| <b>6</b>       | F          | 53         | OS               | PDR                         | No                     | 20/50                 |
| <b>7</b>       | F          | 41         | OD               | PDR                         | No                     | 20/20                 |
| <b>8</b>       | F          | 51         | OD               | PDR                         | Yes                    | 20/20                 |
| <b>9</b>       | M          | 59         | OD               | PDR                         | No                     | 20/15-2               |
| <b>10</b>      | M          | 55         | OD               | PDR                         | No                     | 20/25                 |
| <b>11</b>      | M          | 63         | OD               | PDR                         | Yes                    | 20/50                 |
| <b>12</b>      | F          | 70         | OD               | PDR                         | Yes                    | 20/40                 |

a. DME: diabetic macular edema,

b. VA: Best-corrected Snellen visual acuity,

c. NPDR: nonproliferative diabetic retinopathy,

d. PDR: proliferative diabetic retinopathy

**eTable 2.** Additional Statistics on Vessel Densities and Avascular Areas in Diabetics vs Nondiabetics

|                                             | Mean Difference <sup>a</sup><br>(95% CI) | PPV <sup>b</sup> | NPV <sup>c</sup> |
|---------------------------------------------|------------------------------------------|------------------|------------------|
| Parafoveal<br>Vessel Density<br>(%)         | 12.6 (7.7-17.5)                          | 100%             | 70.6%            |
| Perifoveal<br>Vessel Density<br>(%)         | 10.4 (6.8-14.1)                          | 100%             | 80.0%            |
| FAZ <sup>d</sup> Area<br>(mm <sup>2</sup> ) | -0.16 (-0.28 - -0.05)                    | 85.7%            | 64.7%            |
| Total Avascular<br>Area (mm <sup>2</sup> )  | -0.82 (-0.99 - -0.65)                    | 92.3%            | 100%             |

- a. Mean difference calculated from normal value minus DR value
- b. PPV: positive predictive value
- c. NPV: negative predictive value
- d. FAZ: Foveal avascular zone

**eFigure.** Nonperfusion Detection in Healthy Controls

OCT angiogram of healthy controls that had small detectable areas of nonperfusion.

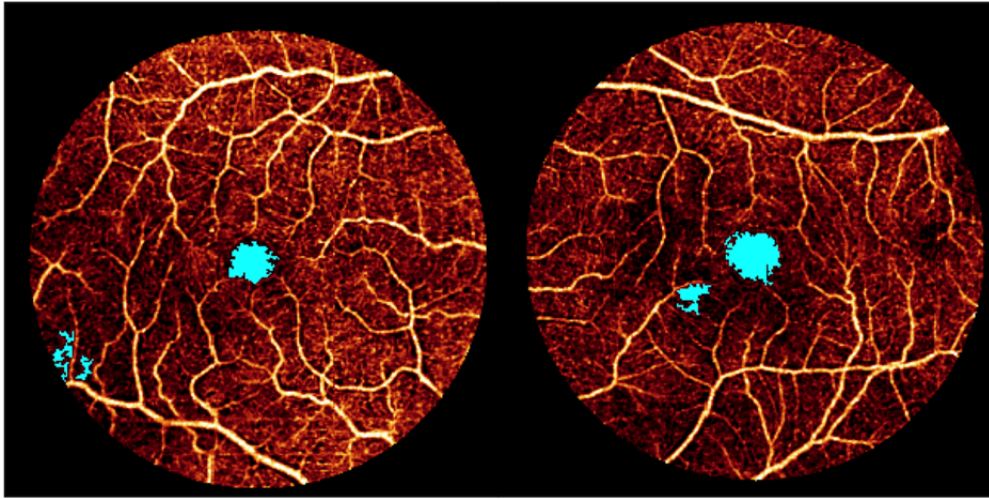

Supplement: NIHMS802649-supplement-Supplement.pdf [file NIHMS802649-supplement-Supplement.pdf]
